# Supplementary material
Source: Springer Nature journal article supplement (https://www.springermedizin.de/resource/supplementary/12913_2011_2084_MOESM1_ESM.pdf/9529776)
Supplement: MOESM1 [file 9529776]

Initialise starting characteristics

On treatment

Not on treatment

T2D

CVD

Death
